# Supplementary material for: Selenium supplementation protects against oxidative stress-induced cardiomyocyte cell cycle arrest through activation of PI3K/AKT
Source: Royal Society of Chemistry journal article supplement (doi:10.1039/d0mt00225a), 2020-11-10
Supplement: d0mt00225a1.pdf [file d0mt00225a1.pdf]

## Supplementary materials

### **Selenium supplementation protects against oxidative stress-induced cardiomyocyte cell cycle arrest through activation of PI3K/AKT**

Wenjuan Sun<sup>1,2</sup>, Jiawei Zhu<sup>1,2</sup>, Shuang Li<sup>1,2</sup>, Chaohua Tang<sup>1,2</sup>, Qingyu Zhao<sup>1,2</sup>, Junmin Zhang<sup>1,2\*</sup>

<sup>1</sup> State Key Laboratory of Animal Nutrition, Institute of Animal Sciences of Chinese Academy of Agricultural Sciences, Beijing 100193, China, [ias@caas.cn](mailto:ias@caas.cn)

<sup>2</sup> Scientific Observing and Experiment Station of Animal Genetic Resources and Nutrition in North China of Ministry of Agriculture and Rural Affairs, Institute of Animal Sciences of Chinese Academy of Agricultural Sciences, Beijing 100193, China, [ias@caas.cn](mailto:ias@caas.cn)

\*Correspondence: [zhjmxms@sina.com](mailto:zhjmxms@sina.com);

---

**Table s1.** Information about the primary antibodies used for the western blot experiment.

| Antibody for  | Company and Cat. # | Source    | Reactivity        | Dilution |
|---------------|--------------------|-----------|-------------------|----------|
| GAPDH         | CST, #2118         | Ra. mono. | H./M./R./etc.     | 1:5000   |
| PTEN          | CST, #9188         | Ra. mono. | H./M./R./etc.     | 1:1000   |
| PI3Kp85       | Abclonal, A11177   | Ra. poly. | H./M./R.          | 1:500    |
| AKT           | Abclonal, A11016   | Ra. poly. | H./M./R.          | 1:500    |
| pAKT          | Abclonal, AP0140   | Ra. poly. | H./M./R./etc.     | 1:500    |
| AKT           | CST, 9272          | Ra. poly. | H./M./R./Pg./etc. | 1:1000   |
| pAKT          | CST, 9271          | Ra. poly. | H./M./R./Pg./etc. | 1:1000   |
| GSK3 $\beta$  | Abclonal, A16868   | Ra. poly. | H./M./R./etc.     | 1:1000   |
| pGSK3 $\beta$ | Abclonal, AP0039   | Ra. poly. | H./M./R./P/etc.   | 1:500    |
| CDK1          | Abclonal, A0020    | Ra. poly. | H./M./R.          | 1:1000   |

H.: human; M.: mouse; R.: rat; Ra.: rabbit; Pg.: Pig; mono. : monoclonal; poly.: polyclonal.

**Table s2. Ingredients and nutrient composition of the basal diet for pigs[1].**

| Item                         | Starter (weight < 25 kg <sup>a</sup> ) | Grower (weight > 25 kg <sup>b</sup> ) |
|------------------------------|----------------------------------------|---------------------------------------|
| Ingredients, %               |                                        |                                       |
| Maize                        | 66                                     | 74.7                                  |
| Soybean meal                 | 26.2                                   | 20                                    |
| Soybean oil                  | 3.6                                    | 1.6                                   |
| Sodium chloride              | 0.5                                    | 0.3                                   |
| Limestone                    | 0.9                                    | 0.9                                   |
| Dicalcium phosphate          | 1                                      | 0.9                                   |
| Lysine (%)                   | 0.8                                    | 0.6                                   |
| Premix <sup>1</sup>          | 1                                      | 1                                     |
| Digestible energy (Kcal /kg) | 3493.28                                | 3405.15                               |
| Crude protein (%)            | 15.88                                  | 14.17                                 |
| Calcium (%)                  | 0.71                                   | 0.67                                  |
| Available phosphorus (%)     | 0.29                                   | 0.27                                  |
| Lysine (%)                   | 1.23                                   | 0.98                                  |
| Methionine (%)               | 0.36                                   | 0.28                                  |
| Threonine (%)                | 0.73                                   | 0.59                                  |
| Tryptophan (%)               | 0.20                                   | 0.17                                  |

<sup>1</sup>Premix provided (per kg feed): Cu (5 mg<sup>a</sup>, 4 mg<sup>b</sup>), I (0.14 mg<sup>a,b</sup>), Fe (100 mg<sup>a</sup>, 60 mg<sup>b</sup>), Mn (3 mg<sup>a</sup>, 2 mg<sup>b</sup>), Zn (80 mg<sup>a</sup>, 60 mg<sup>b</sup>), vitamin A (1750 IU<sup>a</sup>, 1300 IU<sup>b</sup>), vitamin D<sub>3</sub> (200 IU<sup>a</sup>, 150 IU<sup>b</sup>), vitamin E (11 IU<sup>a,b</sup>), vitamin K<sub>3</sub> (0.5 mg<sup>a,b</sup>), biotin (0.05 mg<sup>a,b</sup>), choline (0.4 g<sup>a</sup>, 0.3 g<sup>b</sup>), folic acid (0.3 mg<sup>a,b</sup>), niacin (30 mg<sup>a,b</sup>), d-pantothenic acid (9 mg<sup>a</sup>, 8 mg<sup>b</sup>), vitamin B<sub>1</sub> (1 mg<sup>a,b</sup>), vitamin B<sub>2</sub> (3 mg<sup>a</sup>, 2.5 mg<sup>b</sup>), vitamin B<sub>6</sub> (3 mg<sup>a</sup>, 1 mg<sup>b</sup>), and vitamin B<sub>12</sub> (15 µg<sup>a</sup>, 10 µg<sup>b</sup>).

#### Reference

1. C. Tang, S. Li, K. Zhang, J. Li, Y. Han, T. Zhan, Q. Zhao, X. Guo and J. Zhang, Selenium deficiency-induced redox imbalance leads to metabolic reprogramming and inflammation in the liver, *Redox Biol.*, 2020, 101519.

**Table s3.** List of the primer sequences used for RT-qPCR analysis.

| Gene Name          | Accession number | Primer (5'→ 3')                                        | product size (bp) | Tm (°C) |
|--------------------|------------------|--------------------------------------------------------|-------------------|---------|
| <i>P21</i> (R.)    | NM_031515        | F: AGTGCCTTGACGATACAGCT<br>R: AAAGAAAGCCCTCCCCAGTT3    | 190               | 60      |
| <i>CDK1</i> (R.)   | NM_019296.1      | F:AGTTCATGGATTCTTCGCTCGTT<br>R:CTGCCAGTTTGATTGTTCCTTTG | 144               | 60      |
| <i>CDK2</i> (R.)   | NM_199501.1      | F: CCAGGAGTTACTTCTATGCC<br>R:GCTGAAATCCGCTTGTT         | 149               | 60      |
| <i>CDK4</i> (R.)   | NM_053593.2      | F: CTGTGGTTGTTACGCTCTGG<br>R:CTTCCGGCGAAACATCTCTG      | 116               | 60      |
| <i>CCNB1</i> (R.)  | NM_171991.3      | F: ATTGCAGCTGGGGCTTTTTG<br>R: AGAGATTCTCCGTGTGGGA      | 94                | 60      |
| <i>Actb</i> (R.)   | NM_031144.3      | CCAACCGTGAAAAGATGACCCAGAT<br>TAACCCTCATAGATGGGCACAGTGT | 166               | 60      |
| <i>GAPDH</i> (R.)  | NM_017008.4      | F: ATCACCATCTTCCAGGAGCGA<br>R:ACGCCAGTAGACTCCACGACA    | 83                | 60      |
| <i>p21</i> (Pg.)   | XM_013977858.2   | F:ACCCCTTCCCCATACCC<br>R:TTCCTAACACCCATGAAACTG         | 247               | 60      |
| <i>CDK1</i> (Pg.)  | NM_001159304.2   | F:CAGCTCGCTACTCAACTCCA<br>R:GAGTGCCCAAAGCTCTGAAA       | 135               | 60      |
| <i>CDK2</i> (Pg.)  | XM_003126260.5   | F:CGGAGCTTGTTATCGCAAAT<br>R:AGGGGTAGGGTTCACAAAGG       | 143               | 60      |
| <i>CDK4</i> (Pg.)  | NM_001123097.1   | F:GCATCCCAATGTTGTCCG<br>R:GGGGTGCCTTGTCCAGATA          | 126               | 60      |
| <i>CCNB1</i> (Pg.) | NM_001170768.1   | F:TGGCTAGTGCAGGTTTCAG<br>R:CAGTCACAAAGGCAAAGT          | 199               | 60      |
| <i>GAPDH</i> (Pg.) | XM_021091114.1   | F:CAGCAATGCCTCCTGTACCA<br>R:CCACGATGCCGAAGTTGTC        | 74                | 60      |

R.: rat; Pg.: Pig;

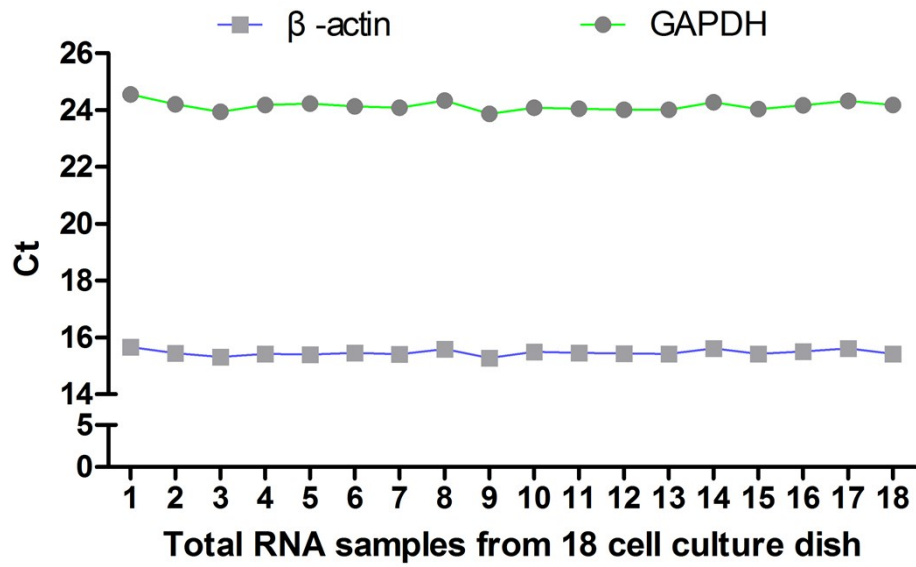

Fig. s1 Cycle threshold (Ct) of mRNA abundances of *GAPDH* and *Actb* in the 18 cell samples. Each point represented the average value of triplicated assays for 1 cell sample. Pearson correlation analysis was performed to evaluate the consistency of the two housekeeping genes with a coefficient of 0.86 ( $P < 0.01$ ,  $n = 18$ )
